# Supplementary material for: Patterns of objectively assessed sedentary time and physical activity among Japanese workers: a cross-sectional observational study
Source: PubMed Central journal article supplement — BMJ Open. 2019 Feb 24;9(2):e021690. doi: 10.1136/bmjopen-2018-021690 (PMC6443067; doi:10.1136/bmjopen-2018-021690), 2019-02-24
Supplement: bmjopen-2018-021690supp001.pdf [file bmjopen-2018-021690supp001.pdf]

**Table S1. Basic characteristics for participants of part-time workers**

|                                                     | All participants | Occupational task group |           |           |
|-----------------------------------------------------|------------------|-------------------------|-----------|-----------|
|                                                     |                  | Sitting                 | Standing  | Walking   |
| <b>n</b>                                            | 98               | 35 (35.7)               | 35 (35.7) | 27 (27.6) |
| <b>Age, mean(SD)</b>                                | 51.1(7.3)        | 50.4 (6.8)              | 52.7(8.0) | 49.9(6.8) |
| <b>Women, n (%)</b>                                 | 94 (95.9)        | 34 (97.1)               | 33 (94.3) | 26 (96.3) |
| <b>BMI (kg/m<sup>2</sup>)<sup>a</sup>, mean(SD)</b> | 21.1(2.2)        | 21.2 (2.3)              | 20.9(2.1) | 21.3(2.2) |
| <b>Residence area, n (%)</b>                        |                  |                         |           |           |
| Matsuyama city                                      | 44 (44.9)        | 15 (42.9)               | 23 (65.7) | 16 (59.3) |
| Koto Ward                                           | 54 (55.1)        | 20 (57.1)               | 12 (34.3) | 11 (40.7) |
| <b>Education, n (%)</b>                             |                  |                         |           |           |
| High school or less                                 | 44 (44.9)        | 11 (31.4)               | 22 (62.9) | 11 (40.7) |
| Greater than high school                            | 54 (55.1)        | 24 (68.6)               | 13 (37.1) | 16 (59.3) |
| <b>Marital status<sup>b</sup>, n (%)</b>            |                  |                         |           |           |
| Single                                              | 12 (12.2)        | 4 (11.4)                | 4 (11.4)  | 4 (15.4)  |
| Married                                             | 85 (86.7)        | 31 (88.6)               | 31 (88.6) | 22 (84.6) |
| <b>Occupation<sup>c</sup>, n (%)</b>                |                  |                         |           |           |
| Professional and engineering                        | 17 (17.5)        | 6 (17.6)                | 4 (11.4)  | 7 (25.9)  |
| Administrative and managerial                       | 0 (0.0)          | 0 (0.0)                 | 0 (0.0)   | 0 (0.0)   |
| Clerical                                            | 23 (23.7)        | 21 (61.8)               | 2 (5.7)   | 0 (0.0)   |
| Sales                                               | 7 (7.2)          | 1 (2.9)                 | 5 (14.3)  | 1 (3.7)   |
| Service                                             | 33 (34)          | 3 (8.8)                 | 18 (51.4) | 11 (40.7) |
| Security                                            | 1 (1.0)          | 0 (0.0)                 | 1 (2.9)   | 0 (0.0)   |
| Agricultural, forestry and fishery                  | 0 (0.0)          | 0 (0.0)                 | 0 (0.0)   | 0 (0.0)   |
| Transport and machine operation                     | 0 (0.0)          | 0 (0.0)                 | 0 (0.0)   | 0 (0.0)   |
| Manufacturing process                               | 5 (5.2)          | 1 (2.9)                 | 3 (8.6)   | 1 (3.7)   |
| Others                                              | 10 (10.3)        | 1 (2.9)                 | 2 (5.7)   | 7 (25.9)  |

a 1 missing in standing task group

b 1 missing in walking task group

c 1 missing in sitting task group

**Table S2 Comparison of sedentary behavior and physical activity among three occupational activity types in part-time workers**

|                                               | All        | Occupational activity types |             |             |
|-----------------------------------------------|------------|-----------------------------|-------------|-------------|
|                                               |            | Sitting                     | Standing    | Walking     |
| Mean (SD)                                     |            |                             |             |             |
| <b>Wear time (hours)</b>                      |            |                             |             |             |
| All days                                      | 15.7(1.44) | 15.7(1.4)                   | 15.5(1.5)   | 16.1(1.5)   |
| Work day                                      | 16.0(1.6)  | 15.9(1.7)                   | 15.8(1.6)   | 16.3(1.7)   |
| Work hours                                    | 6.2(2.4)   | 6.4(2.2)                    | 5.9(2.5)    | 6.5(2.5)    |
| Non-work hours                                | 9.7(3.0)   | 9.5(2.8)                    | 9.8(2.8)    | 9.9(3.7)    |
| Non-work day                                  | 15.1(1.6)  | 15.0(1.2)                   | 14.7(1.9)   | 15.6(1.6)   |
| <b>Total sedentary (%wear time)</b>           |            |                             |             |             |
| All days                                      | 47.6(9.8)  | 53.9(7.7)                   | 44.7(10.3)  | 43.6(7.7)   |
| Work day                                      | 45.1(11.3) | 54.2 (7.9)                  | 40.1 (10.9) | 40.3 (8.4)  |
| Work hours                                    | 36.6(23.4) | 59.9 (12.6)                 | 24.4 (19.4) | 23.4 (14.3) |
| Non-work hours                                | 49.8(9.7)  | 50.2 (8.9)                  | 49.5 (10.8) | 49.7 (9.9)  |
| Non-work day                                  | 53.9(12.7) | 53.1 (12.0)                 | 56.4 (14.6) | 51.8 (11.2) |
| <b>Prolonged sedentary bouts (%wear time)</b> |            |                             |             |             |
| All days                                      | 14.4(7.6)  | 15.1(8.0)                   | 15.0(8.0)   | 12.7(6.4)   |
| Work day                                      | 12.2(7.1)  | 14.0 (8.1)                  | 11.4 (6.6)  | 10.7 (6.3)  |
| Work hours                                    | 6.8(11.3)  | 12.5 (14.4)                 | 4.3 (9.5)   | 2.7 (3.9)   |
| Non-work hours                                | 15.8(9.1)  | 15.4 (9.0)                  | 15.8 (8.7)  | 15.8 (9.8)  |
| Non-work day                                  | 20.0(14.3) | 18.0 (13.4)                 | 24.0 (16.4) | 17.5 (12.1) |
| <b>Breaks per sedentary hour</b>              |            |                             |             |             |
| All days                                      | 10.8(2.3)  | 10.1(1.9)                   | 11.1(2.7)   | 11.2(2.2)   |
| Work day                                      | 11.3(2.6)  | 10.3 (2.2)                  | 12 (2.9)    | 11.7 (2.6)  |
| Work hours                                    | 19.4(11.7) | 11.6 (4.8)                  | 24.3 (12.5) | 23.1 (12.3) |
| Non-work hours                                | 9.9(2.5)   | 9.7 (2.2)                   | 10.2 (2.4)  | 9.9 (2.9)   |
| Non-work day                                  | 9.5(3.7)   | 9.8 (3.6)                   | 8.9 (4.4)   | 9.8 (3.1)   |
| <b>LPA (%wear time)</b>                       |            |                             |             |             |
| All days                                      | 44.2(8.4)  | 39.2(6.9)                   | 47.5(8.5)   | 46.3(7.2)   |
| Work day                                      | 46.0(10.0) | 38.6 (7.5)                  | 51.5 (9.1)  | 48.6 (8.2)  |
| Work hours                                    | 53.0(19.4) | 35.3 (11.7)                 | 65.4 (16.3) | 59.6 (14.3) |
| Non-work hours                                | 41.7(9.0)  | 40.4 (8.3)                  | 42.8 (9.9)  | 42.1 (8.9)  |
| Non-work day                                  | 39.7(10.2) | 41 (10.4)                   | 37.5 (11.3) | 41 (8.3)    |
| <b>MVPA (%wear time)</b>                      |            |                             |             |             |
| All days                                      | 8.1(3.9)   | 6.9(2.5)                    | 15.6(3.4)   | 10.0(5.2)   |
| Work day                                      | 8.8(4.6)   | 7.2 (2.8)                   | 8.4 (3.8)   | 11.1 (6.1)  |
| Work hours                                    | 10.4(11.1) | 4.8 (3.2)                   | 10.2 (7.2)  | 17 (16.3)   |
| Non-work hours                                | 8.4(4.2)   | 9.4 (4.4)                   | 7.7 (4.3)   | 8.2 (3.8)   |
| Non-work day                                  | 6.4(4.8)   | 5.9 (2.8)                   | 6.2 (4.9)   | 7.2 (6.6)   |
